# Supplementary material for: Resveratrol Stabilization and Loss by Sodium Caseinate, Whey and Soy Protein Isolates: Loading, Antioxidant Activity, Oxidability
Source: MDPI journal article supplement (doi:10.3390/antiox11040647), 2022-03-28
Supplement: s1 [file s1]

## **Supplementary Data**

### **Mechanism of resveratrol stabilization and loss by sodium caseinate, whey and soy protein isolates: loading, antioxidant activity, oxidability**

Xin Yin<sup>1,2</sup>, Hao Cheng<sup>1,2</sup>, Wusigale<sup>3,4</sup>, Huanhuan Dong<sup>1,2</sup>, Li Liang<sup>1,2\*</sup>

<sup>1</sup>State Key Lab of Food Science and Technology, Jiangnan University, Wuxi, Jiangsu, China

<sup>2</sup>School of Food Science and Technology, Jiangnan University, Wuxi, Jiangsu, China

<sup>3</sup>Key Laboratory of Dairy Biotechnology and Engineering, Ministry of Education, Inner Mongolia Agricultural University, Hohhot, Inner Mongolia, China

<sup>4</sup>Inner Mongolia Key Laboratory of Dairy Biotechnology and Engineering, Hohhot, Inner Mongolia, China

\*Corresponding author: Li Liang

Address: State Key Lab of Food Science and Technology, School of Food Science and Technology, Jiangnan University, Wuxi, Jiangsu 214122, China.

Telephone: +86(510)8519-7367;

Email: [liliang@jiangnan.edu.cn](mailto:liliang@jiangnan.edu.cn).

Turbidity was determined from the transmission at 500 nm according the method by (Liang et al., 2011), using a UV-1800 UV-Vis spectrophotometer (Shimadzu Co., Tokyo, Japan) and expressed as (100-% transmission).

**Table S1.** Turbidity of WPI-resveratrol, SC-resveratrol and SPI-resveratrol complex nanoparticles at various concentrations of proteins and resveratrol.

| Concentration of proteins (%) | Concentration of resveratrol (μM) |                          |                          |                          |
|-------------------------------|-----------------------------------|--------------------------|--------------------------|--------------------------|
|                               | 0                                 | 25                       | 50                       | 100                      |
| WPI                           |                                   |                          |                          |                          |
| 0.01                          | 0.29±0.11 <sup>Aa</sup>           | 0.79±0.11 <sup>Ba</sup>  | 0.60±0.10 <sup>Ba</sup>  | 0.81±0.14 <sup>Ba</sup>  |
| 0.1                           | 0.51±0.07 <sup>Ab</sup>           | 0.90±0.15 <sup>Ba</sup>  | 0.97±0.02 <sup>Bb</sup>  | 0.82±0.21 <sup>Ba</sup>  |
| 1                             | 4.96±0.13 <sup>Ac</sup>           | 5.00±0.34 <sup>Ab</sup>  | 4.82±0.27 <sup>Ac</sup>  | 4.74±0.18 <sup>Ab</sup>  |
| SC                            |                                   |                          |                          |                          |
| 0.01                          | 0.27±0.03 <sup>Aa</sup>           | 0.35±0.03 <sup>Ba</sup>  | 0.35±0.08 <sup>Ba</sup>  | 0.33±0.01 <sup>Ba</sup>  |
| 0.1                           | 2.19±0.14 <sup>Ab</sup>           | 2.05±0.18 <sup>Ab</sup>  | 2.00±0.14 <sup>Ab</sup>  | 2.01±0.09 <sup>Ab</sup>  |
| 1                             | 17.82±0.13 <sup>Ac</sup>          | 17.86±0.30 <sup>Ac</sup> | 17.80±0.07 <sup>Ac</sup> | 17.58±0.07 <sup>Ac</sup> |
| SPI                           |                                   |                          |                          |                          |
| 0.01                          | 0.98±0.09 <sup>Aa</sup>           | 1.92±0.48 <sup>Ba</sup>  | 1.88±0.49 <sup>Ba</sup>  | 2.07±0.28 <sup>Ba</sup>  |
| 0.1                           | 9.19±0.08 <sup>Ab</sup>           | 13.70±1.72 <sup>Bb</sup> | 13.78±1.81 <sup>Bb</sup> | 13.90±1.83 <sup>Bb</sup> |
| 1                             | 51.50±0.19 <sup>Ac</sup>          | 51.60±2.41 <sup>Ac</sup> | 51.66±2.12 <sup>Ac</sup> | 51.04±2.12 <sup>Ac</sup> |

Note: Different lower case letters in the same column represent different significance levels, different upper case letters in the same row represent different significance levels (P < 0.05).

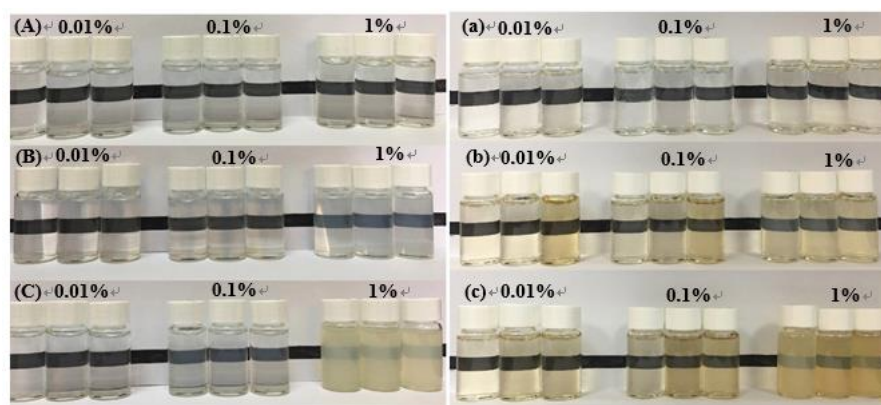

**Figure S1.** Appearance of WPI-resveratrol, SC-resveratrol and SPI-resveratrol complex nanoparticles before (A-C, respectively) and after (a-c, respectively) storage at 45°C for 30 days. The concentration of proteins from left to right were 0.01%, 0.1% and 1%. The concentrations of resveratrol from left to right were 25, 50 and 100  $\mu$ M.

## X-ray diffraction

X-ray diffractogram of resveratrol, proteins, resveratrol-loaded protein particles, physical mixture of protein and resveratrol were analyzed by using a Bruker D2 PHASER X-ray diffractometer (Bruker, Odelzhausen, Germany) equipped with a copper anode that produces Cu K $\alpha$  radiation. The  $2\theta$  angle was set from  $3^\circ$  to  $60^\circ$  in continuous mode using a step size of  $0.02^\circ$  and step time of 5 s and measured at 40 kV of an accelerating voltage and 40 mA of a tube current.

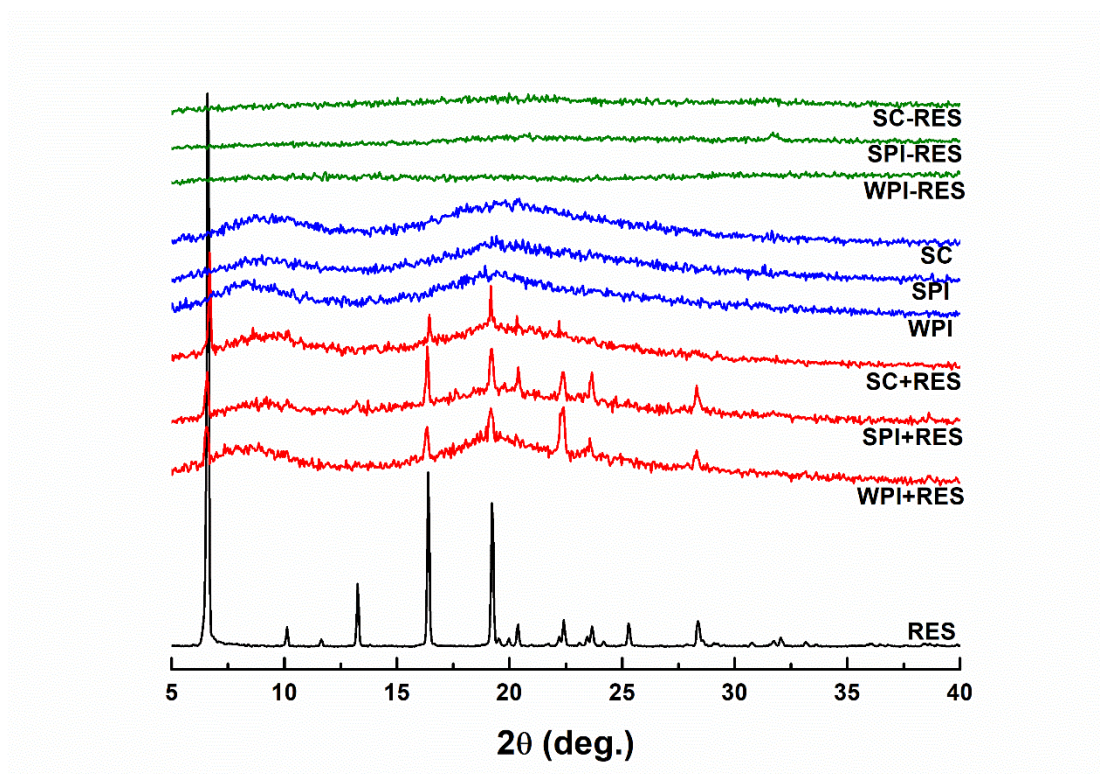

**Figure S2.** XRD patterns of resveratrol (black), proteins (blue), their physical mixtures (red) and resveratrol-loaded protein particles (green). The concentration of protein was 1%.

**Figure S3**

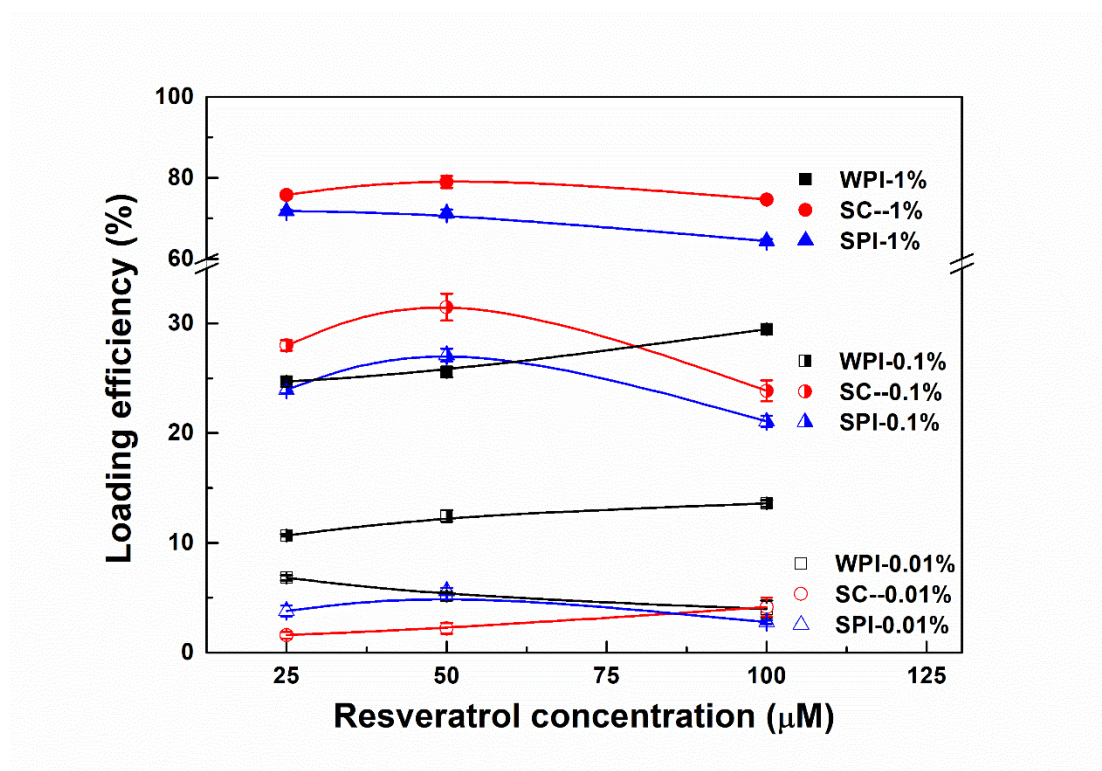

**Figure S3.** Loading efficiency of resveratrol in its complex particles with WPI (black), SC (red) and SPI (blue) at 0.01%, 0.1% and 1% after storage at 45°C.
